# Supplementary material for: Synthesis and physical properties of meta-terphenyloxadiazole derivatives and their application as electron transporting materials for blue phosphorescent and fluorescent devices
Source: Royal Society of Chemistry journal article supplement (doi:10.1039/c2jm33376g), 2012-01-01
Supplement: c2jm33376g.pdf [file c2jm33376g.pdf]

## Supplementary data

Synthesis and physical properties of *meta*-terphenyloxadiazole derivatives and the application as electron transporting materials for blue phosphorescent and fluorescent devices†

Cheng-An Wu,<sup>ab</sup> Ho-Hsiu Chou,<sup>a</sup> Cheng-Hung Shih,<sup>a</sup> Fang-Iy Wu,<sup>a</sup> and Chien-Hong Cheng,<sup>\*a</sup> Heh-Lung Huang,<sup>b</sup> Teng-Chih Chao,<sup>b</sup> Mei-Rurng Tseng<sup>b</sup>

<sup>a</sup>Department of Chemistry, National Tsing Hua University, Hsinchu 30013, Taiwan,

E-mail: [chcheng@mx.nthu.edu.tw](mailto:chcheng@mx.nthu.edu.tw), Fax: 886-3-572469, Tel: 886-3-5721454

<sup>b</sup>Material and Chemical Research Laboratories, Industrial Technology Research Institute, Chutung, Hsinchu 31040, Taiwan

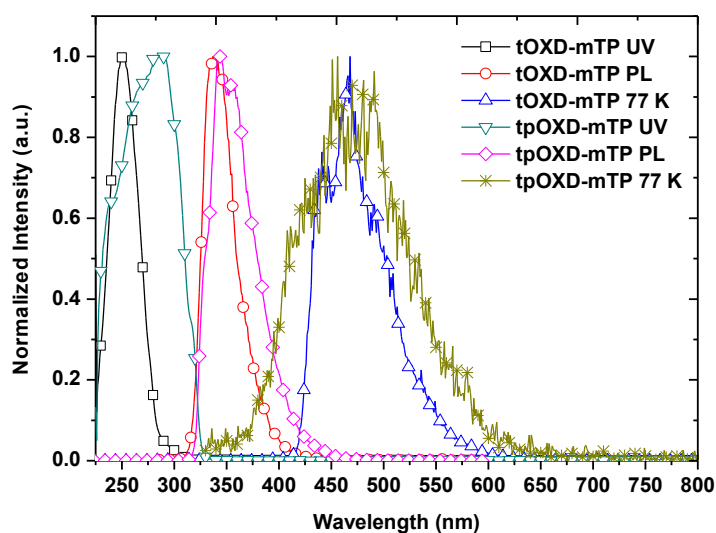

**Fig. S1.** The UV-vis absorption and fluorescence spectra ( $1 \times 10^{-5}$  M) measured in dichloromethane solution at room temperature.

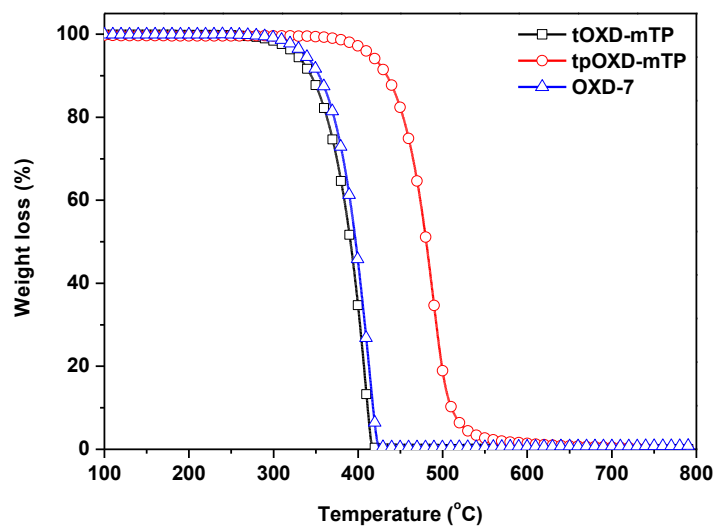

**Fig. S2.** The TGA traces of tOXD-*m*TP, tpOXD-*m*TP and OXD-7 recorded at a heating rate of 10 °C min<sup>-1</sup>.

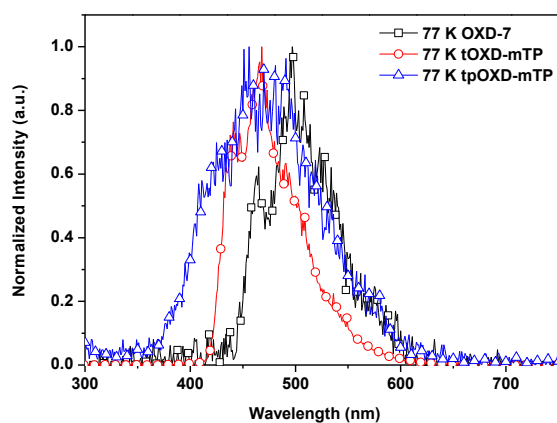

**Fig. S3.** The phosphorescence spectra at 77 K in 2-methyltetrahydrofuran.

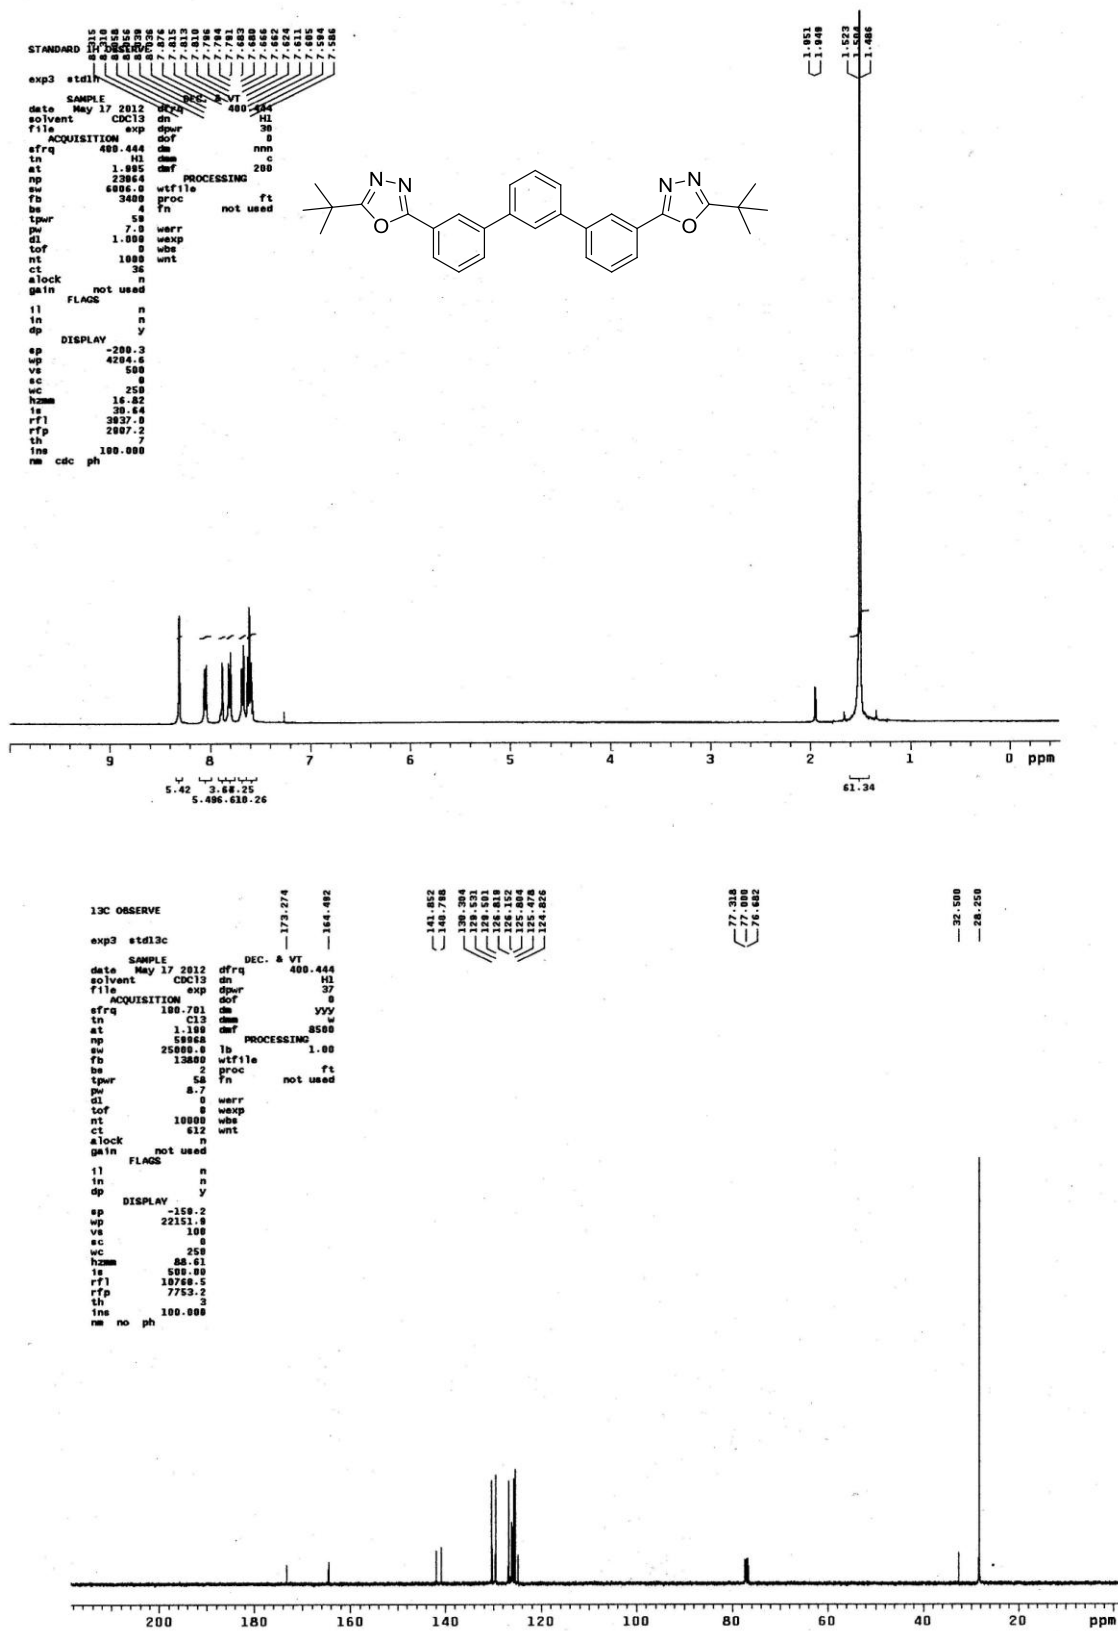

Fig. S4. The  $^1\text{H}$ ,  $^{13}\text{C}$ -NMR spectra of tOXD-*m*TP.



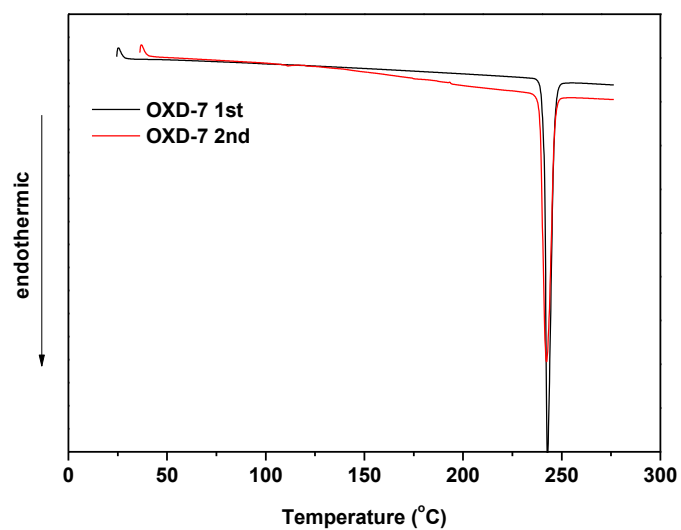

**Fig. S6.** The DSC spectra of OXD-7.

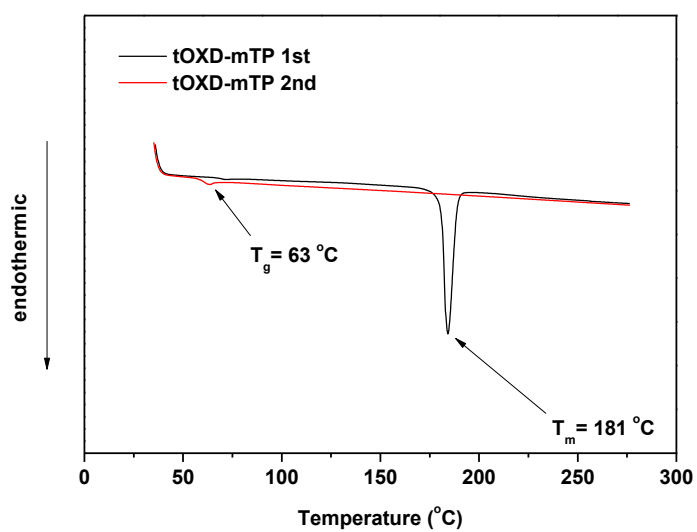

**Fig. S7.** The DSC spectra of tOXD-mTP.

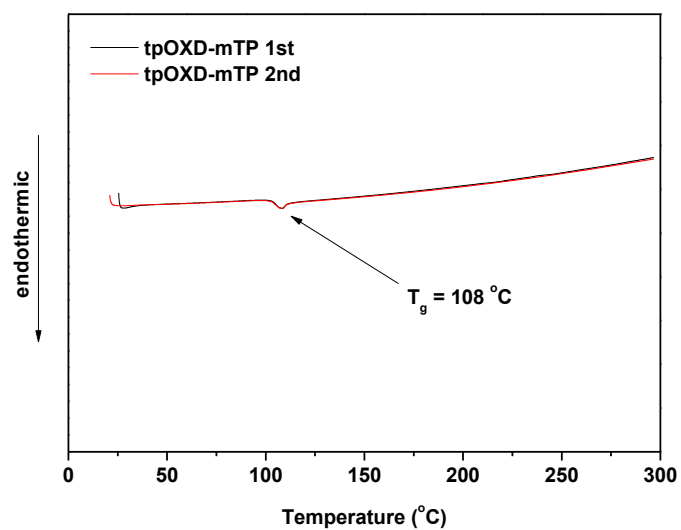

**Fig. S8.** The DSC spectra of tpOXD-mTP.

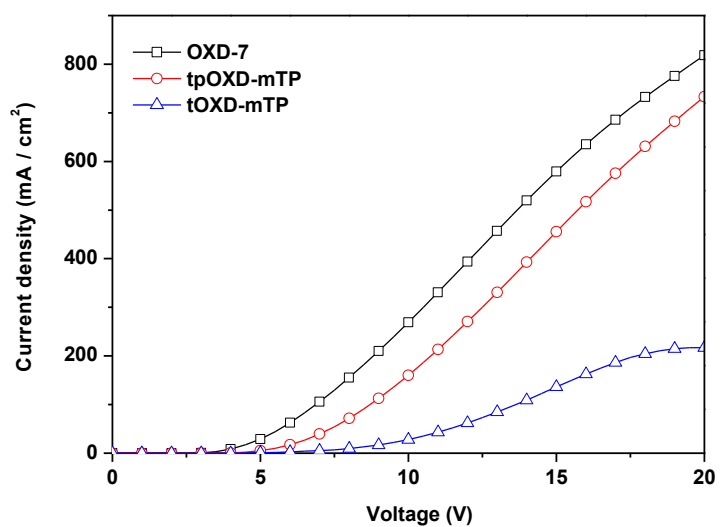

**Fig. S9.** The electron-only device of OXD-7、tOXD-mTP、tpOXD-mTP.

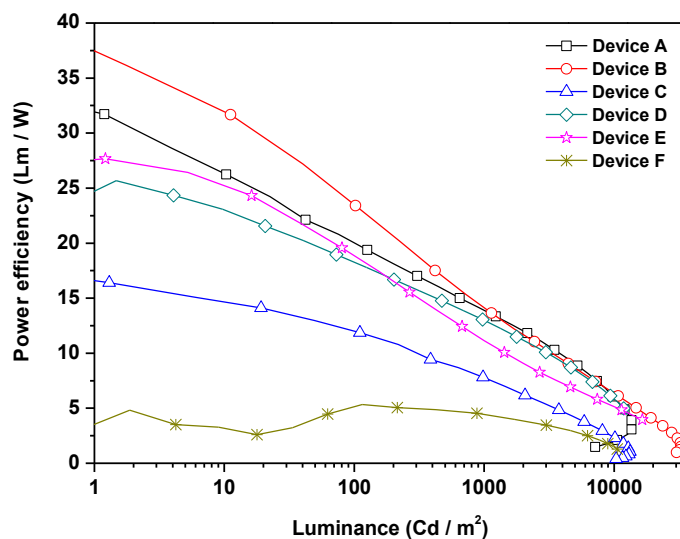

**Fig. S10.** The power efficiency versus luminance for devices A-F.

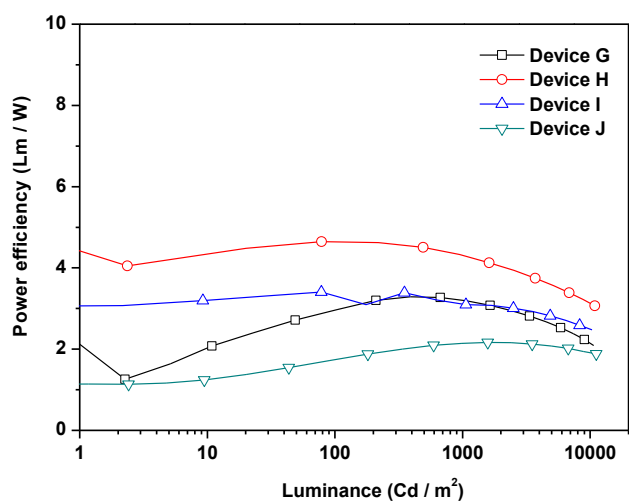

**Fig. S11.** The power efficiency versus luminance for devices G-J.

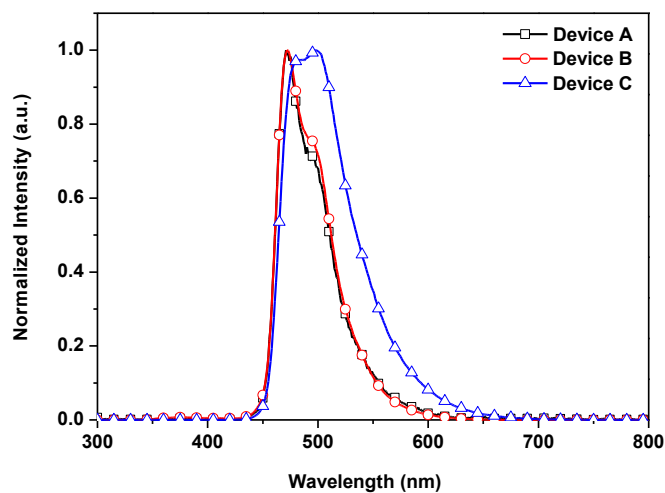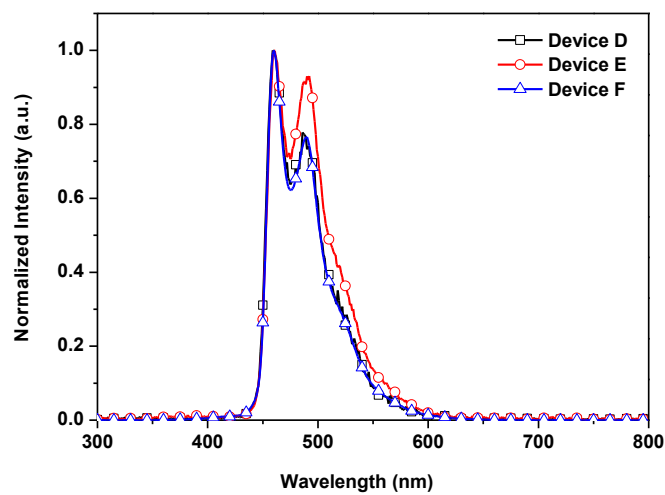

**Fig. S12.** The EL spectra of devices A-F at 8 V.

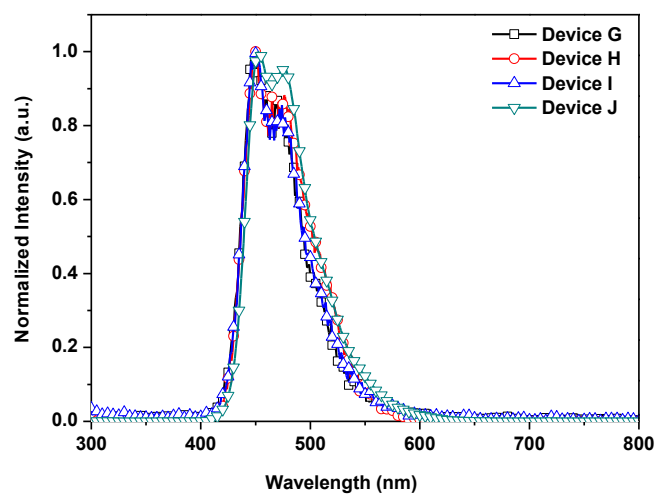

**Fig. S13.** The EL spectra of devices G-J at 8 V.
